# Supplementary material
Source: MDPI journal article supplement (https://www.mdpi.com/2227-9717/11/4/1273)
Supplement: s1 [file s1]

**Table S4.** Sensory perceptions detected in Fiano wines obtained using different vessels: Test A (stainless steel); Test B (earthenware amphora); Test C (mulberry barrel); Test D (cherry barrel).

| Sensory perceptions |           |                    |           |                  |           |                  |           |
|---------------------|-----------|--------------------|-----------|------------------|-----------|------------------|-----------|
| Test A              |           | Test B             |           | Test C           |           | Test D           |           |
| color intensity     | 6.2 ± 1.3 | color intensity    | 7.7 ± 1.2 | color intensity  | 4.2 ± 1.3 | color intensity  | 6.4 ± 1.1 |
| apple               | 6.8 ± 1.4 | toasted hazelnut   | 5.8 ± 1.6 | fresh fruits     | 7.3 ± 1.3 | apple            | 7.4 ± 1.4 |
| hazelnut            | 6.2 ± 1.3 | vanilla            | 5.1 ± 1.1 | wood             | 4.9 ± 1.6 | wood             | 5.3 ± 1.7 |
| hay                 | 3.9 ± 1.1 | vegetable          | 4.2 ± 2.5 | unripe fruits    | 7.4 ± 1.1 | ginger           | 5.4 ± 2.5 |
| astringency         | 0.4 ± 0.7 | fresh wood         | 7.2 ± 2.1 | astringency      | 6.7 ± 2.3 | sweet cherry     | 6.6 ± 1.6 |
| acidity             | 5.7 ± 0.9 | astringency        | 4.4 ± 0.7 | acidity          | 5.3 ± 0.9 | leather          | 3.2 ± 2.7 |
| softness            | 6.7 ± 1.8 | acidity            | 6.5 ± 0.7 | softness         | 4.2 ± 0.9 | sapidity         | 7.1 ± 2.4 |
| ro-hay              | 5.9 ± 1.5 | sapidity           | 7.0 ± 0.6 | ro-wood          | 4.9 ± 1.7 | softness         | 8.3 ± 1.3 |
| ro-apple            | 5.0 ± 0.9 | ro-fresh wood      | 6.0 ± 1.6 | ro-fruity        | 6.6 ± 1.2 | ro-red fruits    | 5.9 ± 2.1 |
| overall judgment    | 6.7 ± 1.6 | ro-fresh vegetable | 4.2 ± 1.0 | overall judgment | 5.6 ± 1.1 | ro-apple         | 3.9 ± 3.7 |
|                     |           | overall judgment   | 6.0 ± 1.3 |                  |           | overall judgment | 7.7 ± 1.2 |

Data are expressed as mean values ± standard deviations (n = 9).
