# Supplementary material
Source: MDPI journal article supplement (https://www.mdpi.com/2227-9717/11/4/1273)
Supplement: s1 [file s1]

**Table S2.** Ethanol production (% Vol.) during alcoholic fermentation in the different vessels: Test A (stainless steel); Test B (earthenware amphora); Test C (mulberry barrel); Test D (cherry barrel).

|        | Fermentation days        |                          |                           |                           |                           |                           |
|--------|--------------------------|--------------------------|---------------------------|---------------------------|---------------------------|---------------------------|
|        | 0                        | 4                        | 8                         | 12                        | 16                        | 20                        |
| Test A | 4.98 ± 0.10 <sup>e</sup> | 6.60 ± 0.10 <sup>d</sup> | 10.50 ± 0.11 <sup>c</sup> | 11.42 ± 0.07 <sup>b</sup> | 11.77 ± 0.21 <sup>a</sup> | 11.80 ± 0.08 <sup>a</sup> |
| Test B | 4.98 ± 0.10 <sup>f</sup> | 7.94 ± 0.15 <sup>e</sup> | 9.00 ± 0.10 <sup>d</sup>  | 11.20 ± 0.20 <sup>c</sup> | 11.83 ± 0.06 <sup>b</sup> | 12.20 ± 0.14 <sup>a</sup> |
| Test C | 4.98 ± 0.10 <sup>e</sup> | 6.85 ± 0.20 <sup>d</sup> | 7.40 ± 0.17 <sup>c</sup>  | 9.03 ± 0.15 <sup>b</sup>  | 10.30 ± 0.10 <sup>a</sup> | 10.60 ± 0.37 <sup>a</sup> |
| Test D | 4.98 ± 0.10 <sup>d</sup> | 6.66 ± 0.15 <sup>c</sup> | 8.51 ± 0.12 <sup>b</sup>  | 10.03 ± 0.15 <sup>a</sup> | 10.27 ± 0.12 <sup>a</sup> | 10.30 ± 0.06 <sup>a</sup> |

Data are expressed as mean values ± standard deviations (n = 3); different letters (a–f), within a row indicate significant differences ( $p \leq 0.05$ )
