# Supplementary material
Source: MDPI journal article supplement (https://www.mdpi.com/2227-9717/11/4/1273)
Supplement: s1 [file s1]

**Table S1.** Reducing sugar (g/L) evolution during alcoholic fermentation in the different vessels: Test A (stainless steel); Test B (earthenware amphora); Test C (mulberry barrel); Test D (cherry barrel).

|        | Fermentation days          |                           |                           |                           |                           |                          |
|--------|----------------------------|---------------------------|---------------------------|---------------------------|---------------------------|--------------------------|
|        | 0                          | 4                         | 8                         | 12                        | 16                        | 20                       |
| Test A | 130.66 ± 4.04 <sup>a</sup> | 96.92 ± 2.01 <sup>b</sup> | 51.67 ± 4.51 <sup>c</sup> | 22.23 ± 1.97 <sup>d</sup> | 3.13 ± 0.23 <sup>e</sup>  | 1.01 ± 0.80 <sup>e</sup> |
| Test B | 130.66 ± 4.04 <sup>a</sup> | 78.16 ± 4.15 <sup>b</sup> | 60.67 ± 2.08 <sup>c</sup> | 24.83 ± 2.75 <sup>d</sup> | 3.07 ± 0.12 <sup>e</sup>  | 0.91 ± 0.07 <sup>e</sup> |
| Test C | 130.66 ± 4.04 <sup>a</sup> | 98.32 ± 1.51 <sup>b</sup> | 79.67 ± 4.51 <sup>c</sup> | 39.33 ± 2.08 <sup>d</sup> | 9.68 ± 0.58 <sup>e</sup>  | 3.03 ± 0.11 <sup>e</sup> |
| Test D | 130.66 ± 4.04 <sup>a</sup> | 99.03 ± 1.05 <sup>b</sup> | 80.40 ± 3.51 <sup>c</sup> | 44.33 ± 4.04 <sup>d</sup> | 12.67 ± 2.52 <sup>e</sup> | 3.50 ± 0.10 <sup>f</sup> |

Data are expressed as mean values ± standard deviations (n = 3); different letters (a–f), within a row indicate significant differences ( $p \leq 0.05$ )
