# Supplementary material
Source: MDPI journal article supplement (https://www.mdpi.com/2227-9717/11/4/1273)
Supplement: s1 [file s1]

**Table S3.** Yeast viable cells counts during alcoholic fermentations in the different vessels: Test A (stainless steel); Test B (earthenware amphora); Test C (mulberry barrel); Test D (cherry barrel).

| Days | Viable cell counts log (CFU/mL) |                          |                          |                          |
|------|---------------------------------|--------------------------|--------------------------|--------------------------|
|      | Test A                          | Test B                   | Test C                   | Test D                   |
| 0    | 7.11 ± 0.04 <sup>a</sup>        | 7.11 ± 0.04 <sup>a</sup> | 7.11 ± 0.04 <sup>a</sup> | 7.11 ± 0.04 <sup>a</sup> |
| 4    | 7.36 ± 0.04 <sup>a</sup>        | 7.30 ± 0.04 <sup>a</sup> | 6.87 ± 0.04 <sup>c</sup> | 7.18 ± 0.03 <sup>b</sup> |
| 8    | 7.24 ± 0.03 <sup>b</sup>        | 7.23 ± 0.05 <sup>b</sup> | 7.23 ± 0.03 <sup>b</sup> | 7.38 ± 0.02 <sup>a</sup> |
| 12   | 7.09 ± 0.06 <sup>a</sup>        | 7.03 ± 0.06 <sup>a</sup> | 6.52 ± 0.03 <sup>c</sup> | 6.95 ± 0.04 <sup>b</sup> |
| 16   | 6.99 ± 0.02 <sup>a</sup>        | 6.88 ± 0.05 <sup>b</sup> | 6.40 ± 0.04 <sup>d</sup> | 6.70 ± 0.03 <sup>c</sup> |
| 20   | 6.96 ± 0.03 <sup>a</sup>        | 6.87 ± 0.03 <sup>b</sup> | 6.38 ± 0.02 <sup>d</sup> | 6.70 ± 0.02 <sup>c</sup> |

Data are expressed as mean values ± standard deviations (n = 3); different letters (a–d), within a row indicate significant differences ( $p \leq 0.05$ ).
