# Supplementary material
Source: MDPI journal article supplement (https://www.mdpi.com/2227-9717/11/4/1273)
Supplement: s1 [file s1]

Archive with 4 entries (4 files):
- Table S1. Reducing sugar evolution.pdf
- Table S2. Ethanol production.pdf
- Table S3. Yeast viable cells counts.pdf
- Table S4. Sensory perceptions.pdf
